# Supplementary material for: Genome-wide mRNA expression profiling in vastus lateralis of COPD patients with low and normal fat free mass index and healthy controls
Source: Springer Nature journal article supplement (doi:10.1186/s12931-014-0139-5), 2015-01-07
Supplement: MOESM2 [file 9759534]

Figure S1. Lung Function and Smoking History.

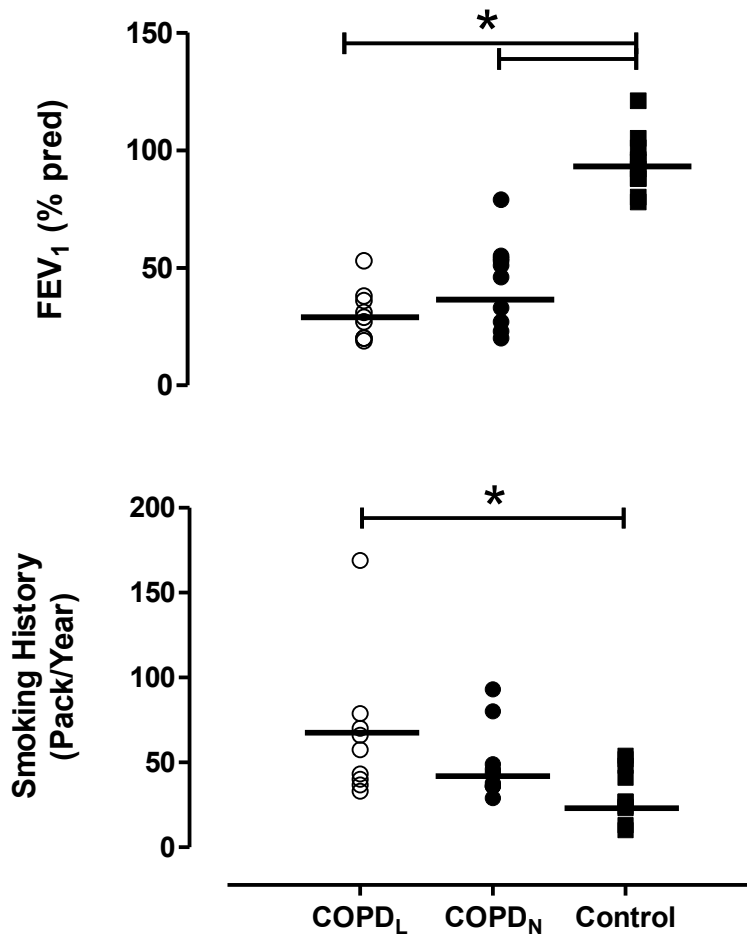

**Figure S1:** Lung Function and Smoking History in COPD<sub>L</sub>, COPD<sub>N</sub> and C. (\*p<0.05).
