# Supplementary material for: Genome-wide mRNA expression profiling in vastus lateralis of COPD patients with low and normal fat free mass index and healthy controls
Source: Springer Nature journal article supplement (doi:10.1186/s12931-014-0139-5), 2015-01-07
Supplement: MOESM3 [file 9759534]

TABLE S1. DEG between COPD<sub>L</sub> and both COPD<sub>N</sub> and C which varied with fibre type II area.

| Source               | Probe        | Gene Symbol | rho   | p      |
|----------------------|--------------|-------------|-------|--------|
| Up-regulated genes   | A_23_P100711 | PMP22       | -0.44 | 0.027  |
|                      | A_23_P403445 | CGREF1      | -0.60 | 0.0013 |
|                      | A_23_P146233 | LPL         | -0.42 | 0.032  |
| Down-regulated genes | A_24_P335092 | SAA1        | 0.49  | 0.012  |
|                      | A_23_P13548  | CHRLD       | 0.39  | 0.05   |
|                      | A_23_P308763 | FARP1       | 0.48  | 0.015  |
|                      | A_24_P401294 | FLJ35934    | 0.44  | 0.029  |

**Table S1.** List of up and down DEG genes between COPD<sub>L</sub> and both COPD<sub>N</sub> and C that varied with type II area in the whole populations.
