# Supplementary material for: Genome-wide mRNA expression profiling in vastus lateralis of COPD patients with low and normal fat free mass index and healthy controls
Source: Springer Nature journal article supplement (doi:10.1186/s12931-014-0139-5), 2015-01-07
Supplement: MOESM4 [file 9759534]

TABLE S2. DEG between COPD<sub>L</sub> and both COPD<sub>N</sub> and C which varied with fibre type II percentage.

| Source               | Probe        | Gene Symbol | rho   | p      |
|----------------------|--------------|-------------|-------|--------|
| Up-regulated genes   | A_23_P59210  | CDKN1A      | 0.39  | <0.05  |
|                      | A_23_P23221  | GADD45A     | 0.47  | <0.05  |
|                      | A_23_P19733  | SLS22A3     | 0.59  | <0.005 |
|                      | A_23_P34915  | ATF3        | 0.43  | <0.05  |
|                      | A_23_P313482 | ABRA        | 0.41  | <0.05  |
|                      | A_23_P161218 | ANKRD1      | 0.38  | <0.05  |
|                      | A_24_P193295 | RAB15       | 0.45  | <0.05  |
| Down-regulated genes | A_23_P57089  | PMEPA1      | -0.46 | <0.05  |
|                      | A_24_P319675 | RAB10       | -0.40 | <0.05  |
|                      | A_23_P146339 | GPT         | -0.46 | <0.05  |
|                      | A_24_P96961  | SPSB1       | -0.54 | <0.01  |
|                      | A_24_P368943 | EVX1        | -0.39 | <0.05  |

**Table S2.** List of up and down DEG genes between COPD<sub>L</sub> and both COPD<sub>N</sub> and C that varied with type II fibre percentage in the whole populations.
