# Supplementary material for: Genome-wide mRNA expression profiling in vastus lateralis of COPD patients with low and normal fat free mass index and healthy controls
Source: Springer Nature journal article supplement (doi:10.1186/s12931-014-0139-5), 2015-01-07
Supplement: MOESM6 [file 9759534]

Figure S2. qPCR graphics for the validated genes between COPD<sub>L</sub> and both other groups COPD<sub>N</sub> and C.

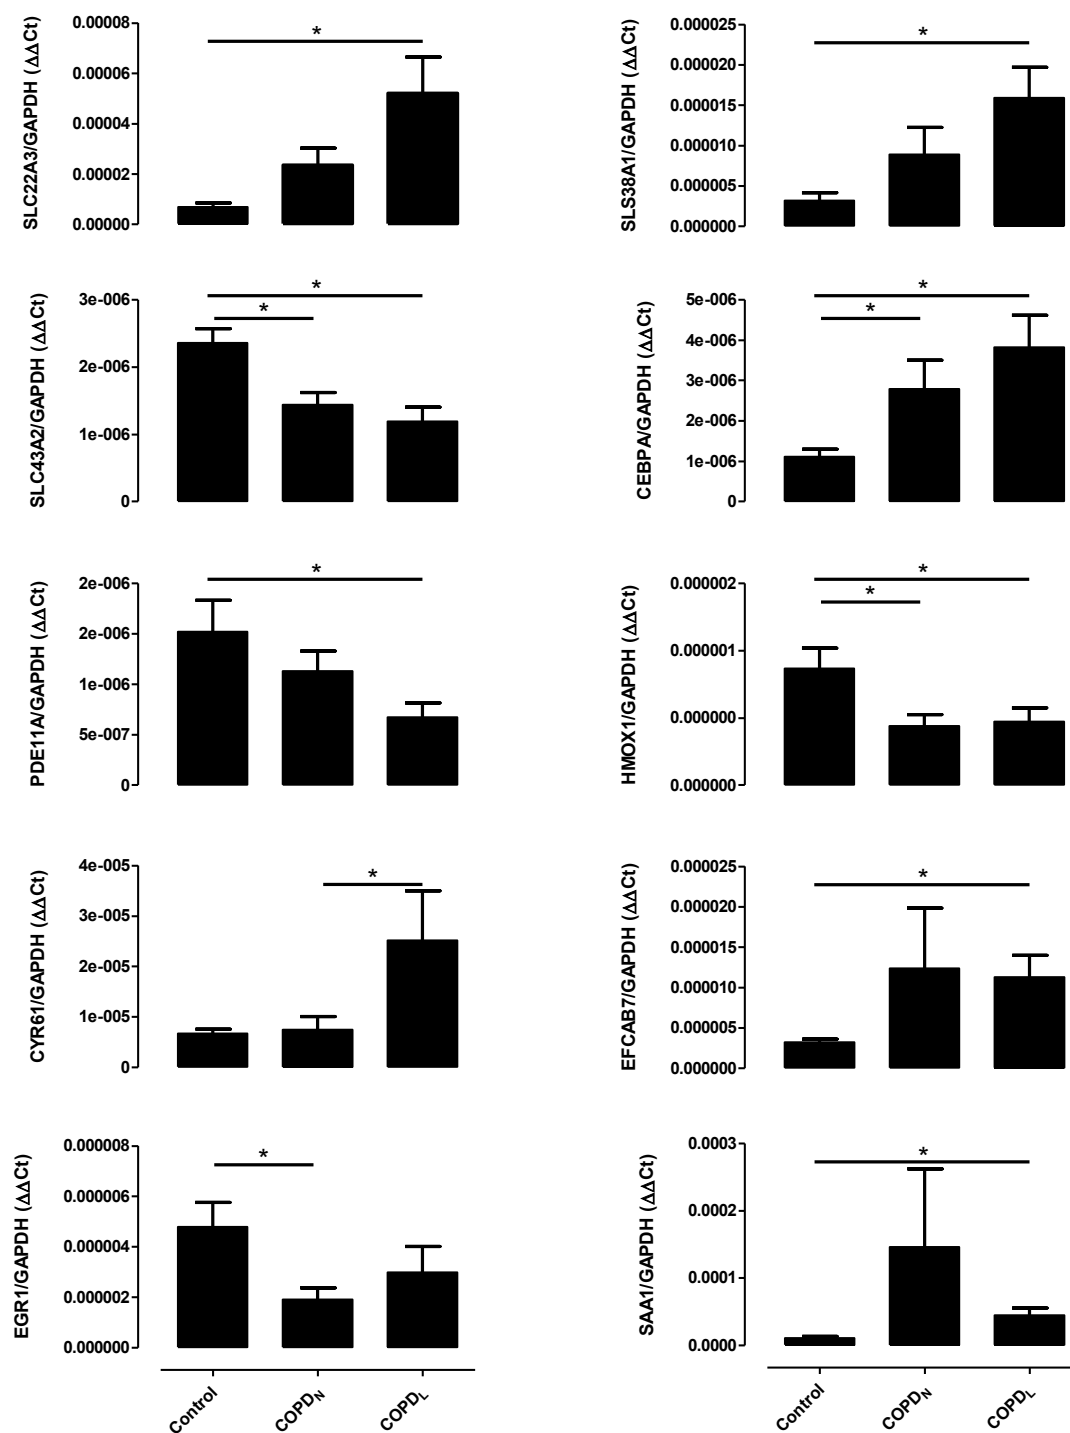

Figure S2: qPCR validated genes in COPD<sub>L</sub>, COPD<sub>N</sub> and C. (\*p<0.05).
