# Supplementary material for: Genome-wide mRNA expression profiling in vastus lateralis of COPD patients with low and normal fat free mass index and healthy controls
Source: Springer Nature journal article supplement (doi:10.1186/s12931-014-0139-5), 2015-01-07
Supplement: MOESM7 [file 9759534]

Figure S3. Correlations between qPCR genes and QMVC

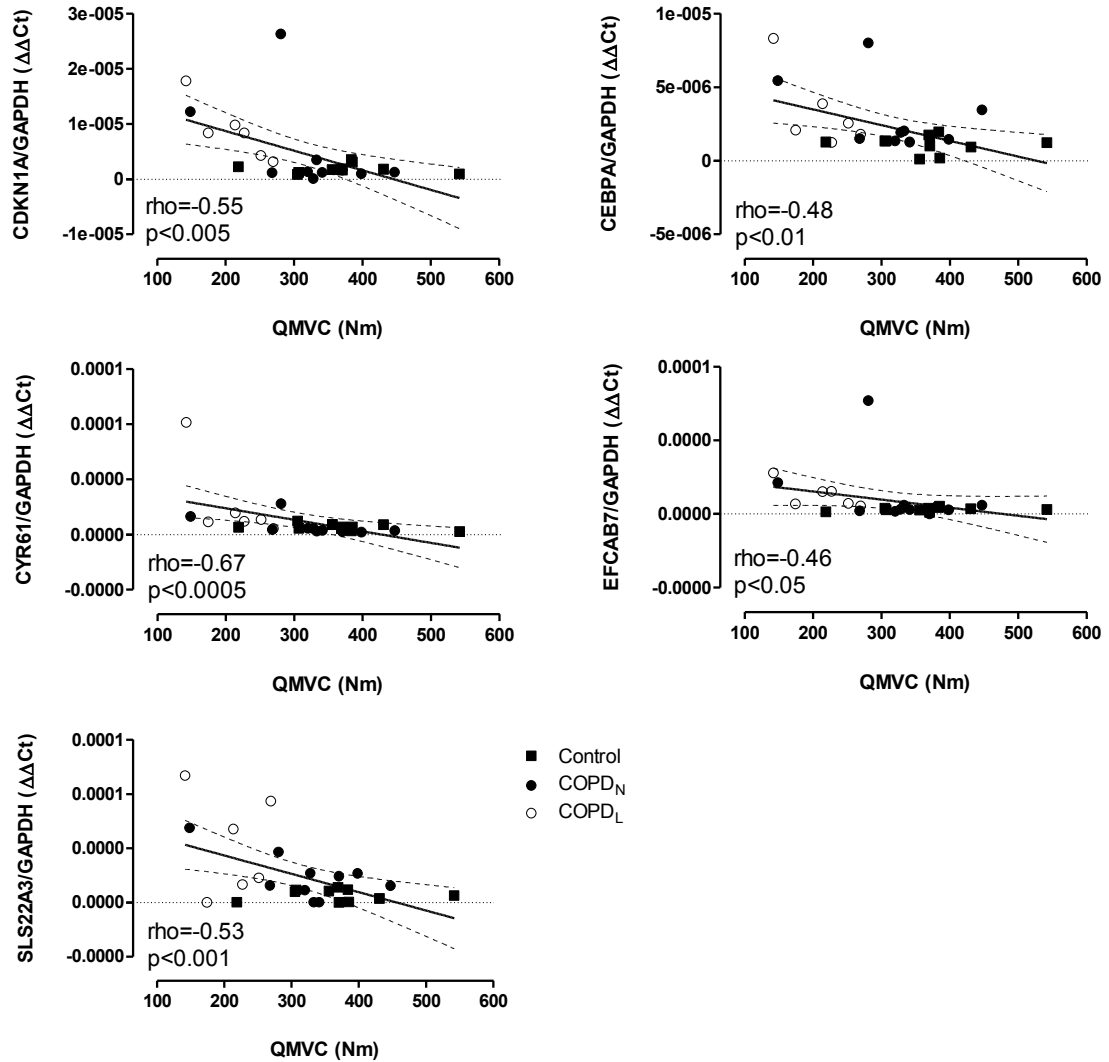

**Figure S3:** Correlations between QMVC (x axis) and qPCR gene expression corrected by GAPDH housekeeping gene ( $\Delta\Delta Ct$ ) in COPD<sub>L</sub> (○), COPD<sub>N</sub> (●) and C (■) (y axis). Solid line represents regression line and dashed lines 95% CI.
